# Supplementary material
Source: Springer Nature journal article supplement (https://www.springermedizin.de/resource/supplementary/12961_2009_131_MOESM1_ESM.pdf/9571602)

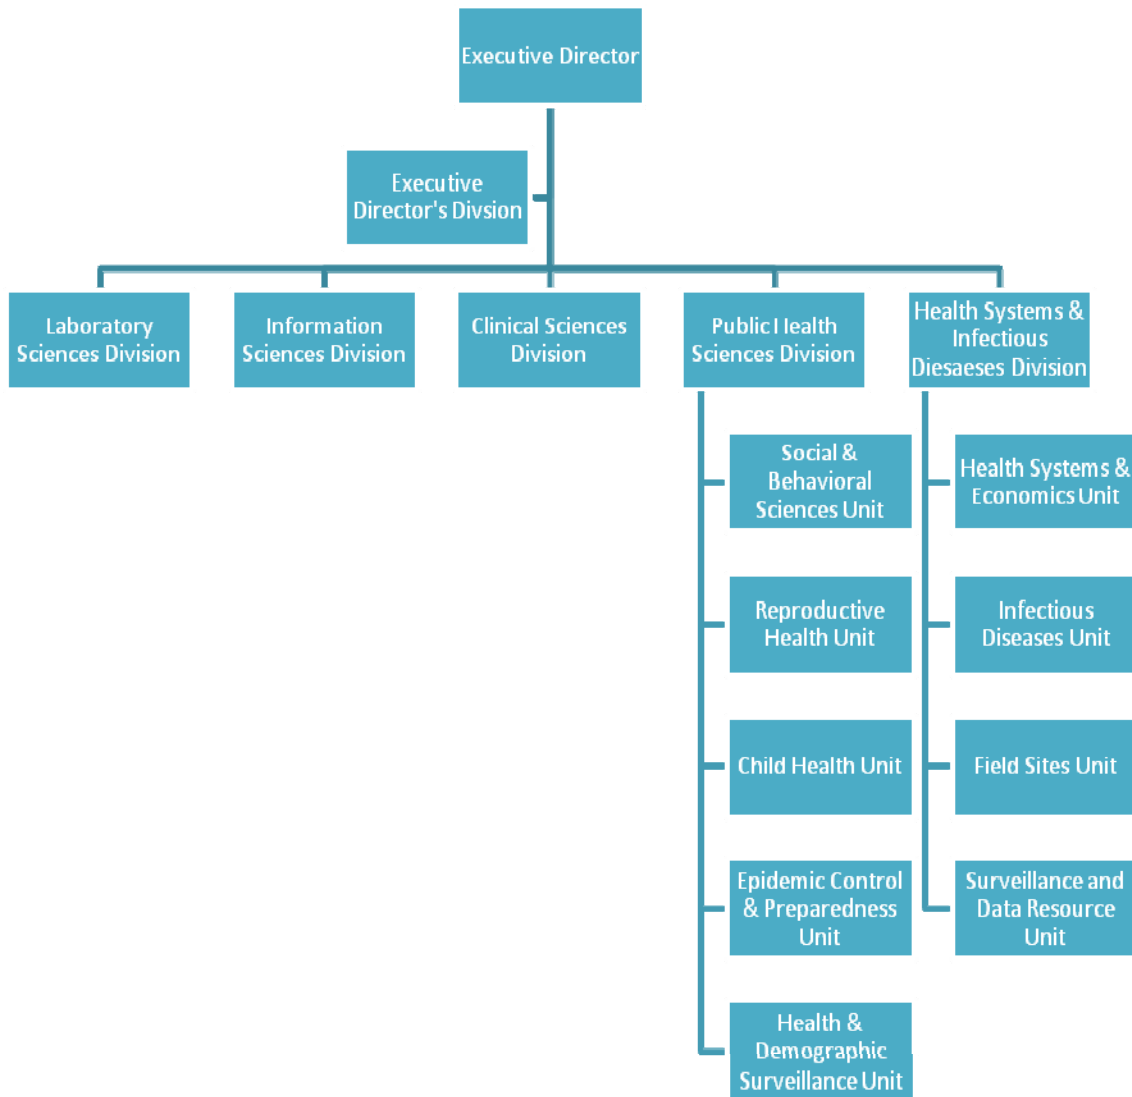

Supplement: MOESM1 [file 9571602]
